# Supplementary material for: Third-order nonlinear optical properties of axially modified indium phthalocyanines with alkyl chains
Source: Royal Society of Chemistry journal article supplement (doi:10.1039/d1nj00775k), 2021-01-01
Supplement: d1nj00775k1.pdf [file d1nj00775k1.pdf]

---

## Supporting Information

### Third-order nonlinear optical properties of axially modified indium phthalocyanine with alkyl chain

Lan Chen,<sup>a</sup> Chunying He,<sup>\*a</sup> Dongmei Liu,<sup>a</sup> Yi Zheng,<sup>\*b</sup> Wanlu Li,<sup>a</sup> and Yanli Zu<sup>a</sup>

E-mail: chunyinghe\_hlju@163.com (Chunying He) and wind\_2000\_love@163.com (Yi Zheng).

<sup>a</sup> Key Laboratory of Functional Inorganic Material Chemistry, Ministry of Education, School of Chemistry and Materials Science, Heilongjiang University, Harbin, 150080, PR China

<sup>b</sup> School of Petrochemical Engineering, Lanzhou University of Technology, Lanzhou, 730050, PR China

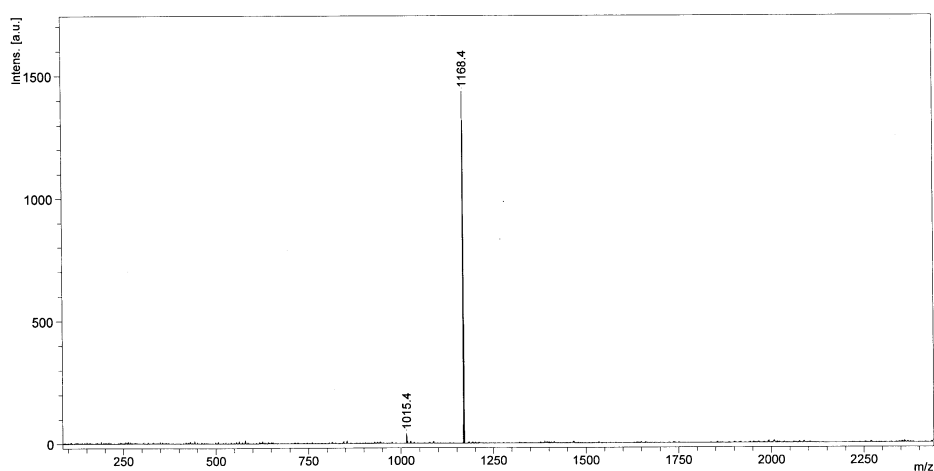

**Fig. S1** The MALDI-TOF MS spectrum of (**InClPc, 4**).

The MALDI-TOF MS spectrum spectra of (**InClPc, 4**) is shown in the **Fig. S1**. 1168.4 corresponds to the molecular weight of Cl removed from (**InClPc, 4**), and (**InClPc, 4**) is combined with CCA. The value corresponding to (**InClPc, 4**) is 1015.4. This value corresponds the molecular weight of (**InClPc, 4**).

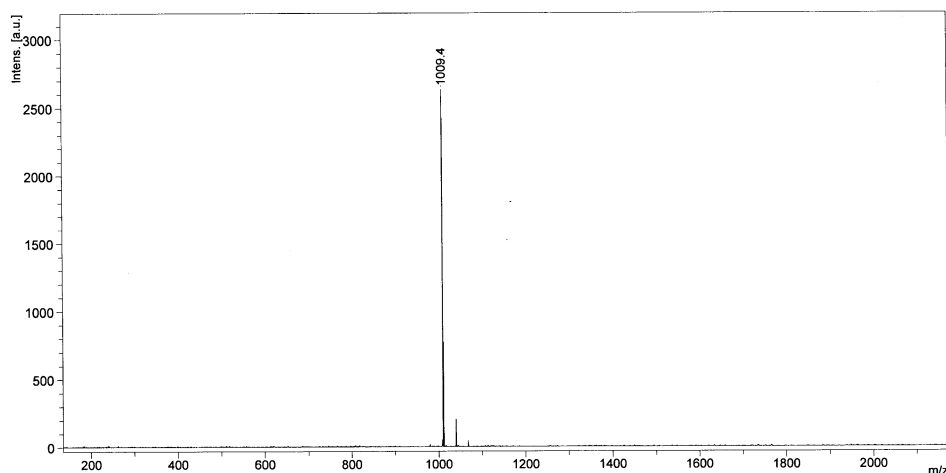

**Fig. S2** The MALDI-TOF MS spectrum of  $((C_2)InPc, 5)$ .

The MALDI-TOF MS spectrum spectra of  $((C_2)InPc, 5)$  is shown in the **Fig. S2**. 1009.4 corresponds to the molecular weight of  $[(C_2)InPc + H]^+$ .

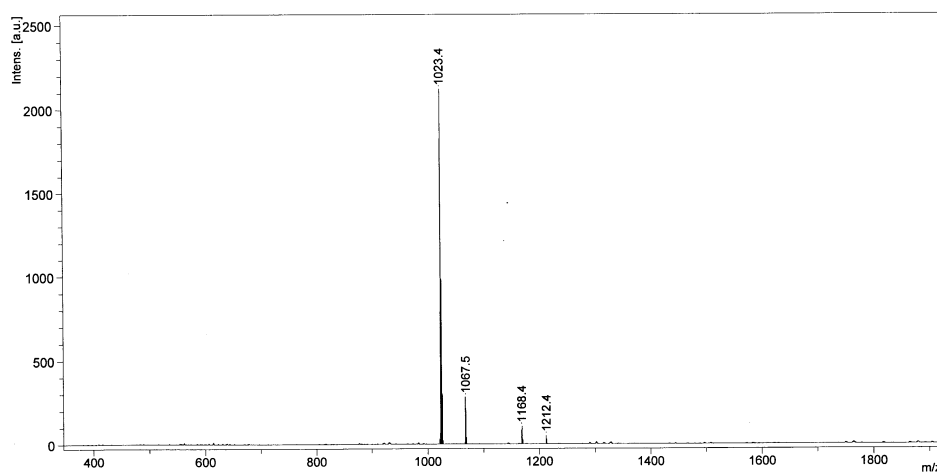

**Fig. S3** The MALDI-TOF MS spectrum of  $((C_3)InPc, 6)$

The MALDI-TOF MS spectrum spectra of  $((C_3)InPc, 6)$  is shown in the **Fig. S3**. 1023.4 corresponds to the molecular weight of  $[(C_3)InPc + H]^+$ , and 1067.5 corresponds to the molecular weight of  $[(C_3)InPc + [C_3H_7]^+]$ . 1168.4 corresponds to the molecular weight of  $[InClPc^+ + CCA]$ , and 1212.4 corresponds to the molecular weight of  $[(C_3)InPc + CCA]$ .

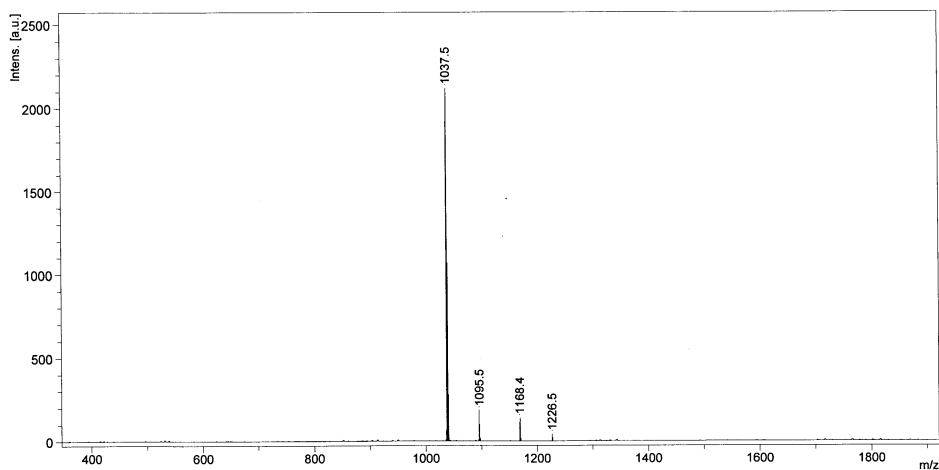

**Fig. S4** The MALDI-TOF MS spectrum of **((C<sub>4</sub>)InPc, 7)**.

The MALDI-TOF MS spectrum spectra of **((C<sub>4</sub>)InPc, 7)** is shown in the **Fig. S4**. 1037.5 corresponds to the molecular weight of **[(C<sub>4</sub>)InPc + H]<sup>+</sup>**, and 1095.5 corresponds to the molecular weight of **[(C<sub>4</sub>)InPc + [C<sub>4</sub>H<sub>9</sub>]<sup>+</sup>**. 1168.4 corresponds to the molecular weight of **[InClPc<sup>+</sup> + CCA]**, and 1226.5 corresponds to the molecular weight of **[(C<sub>4</sub>)InPc + CCA]**.

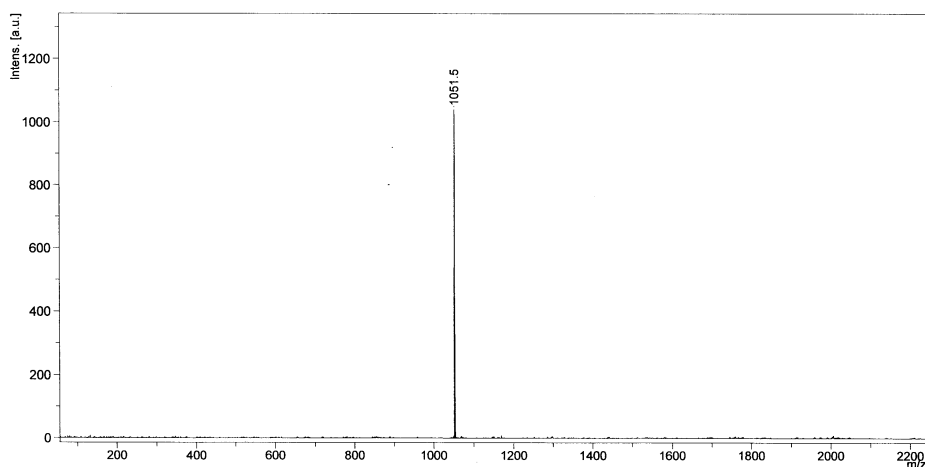

**Fig. S5** The MALDI-TOF MS spectrum of **((C<sub>5</sub>)InPc, 8)**.

The MALDI-TOF MS spectrum spectra of **((C<sub>5</sub>)InPc, 8)** is shown in the **Fig. S5**. 1051.5 corresponds to the molecular weight of **[(C<sub>5</sub>)InPc + H]<sup>+</sup>**.

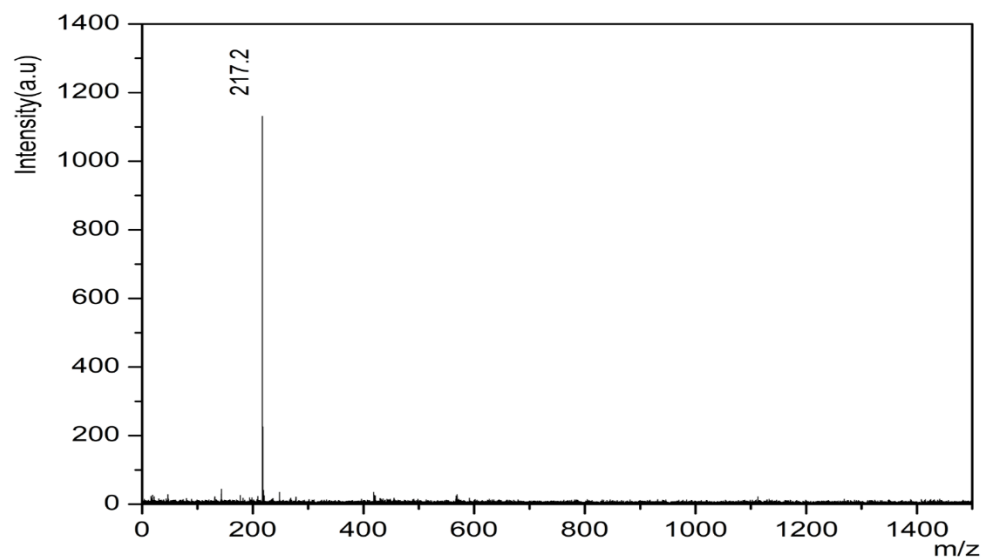

**Fig. S6** The MALDI-TOF MS spectrum of phthalonitrile (**3**).

The MALDI-TOF MS spectrum spectra of phthalonitrile (**3**) is shown in the **Fig. S6**. 217.2 corresponds to the molecular weight of  $[3 + H]^+$ .

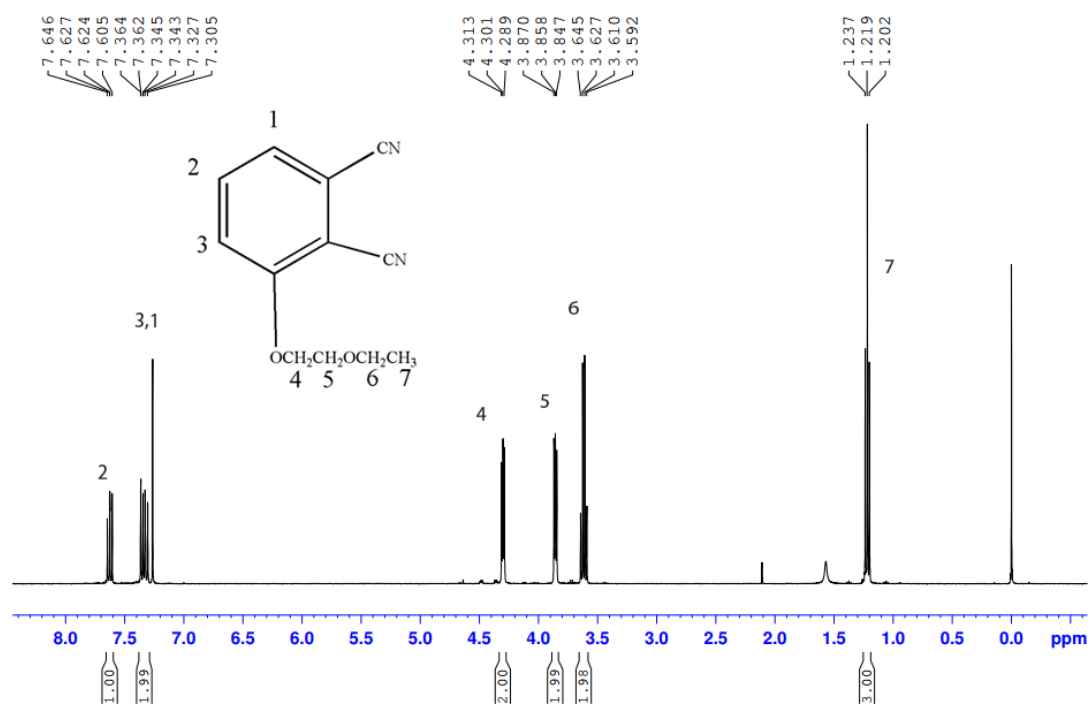

**Fig. S7**  $^1\text{H}$  NMR spectrum of tetra-[3-(2-ethoxy)ethoxy] phthalonitrile (**3**).

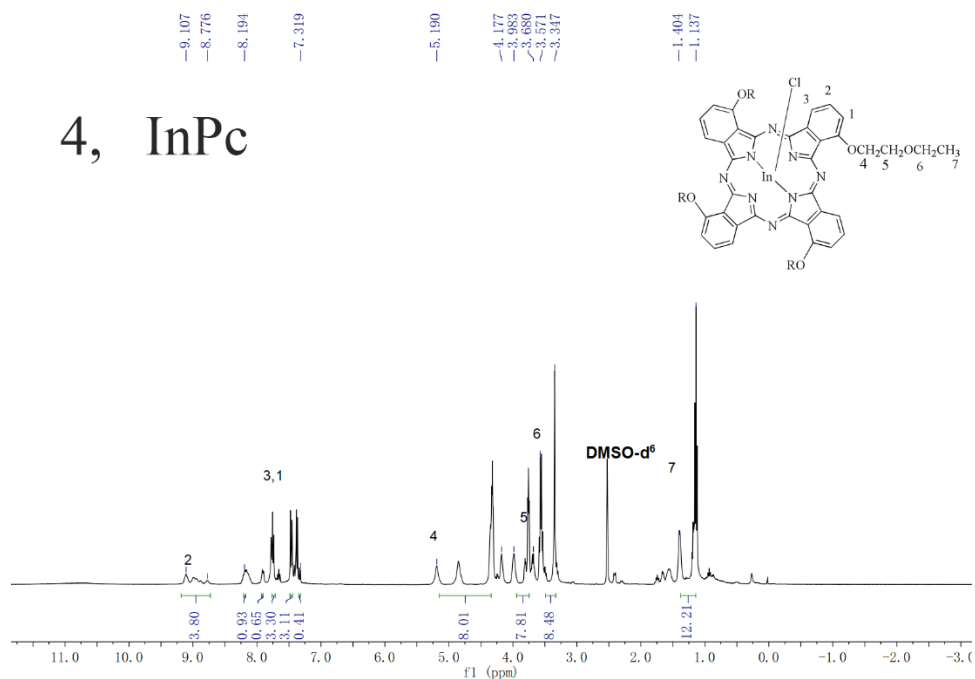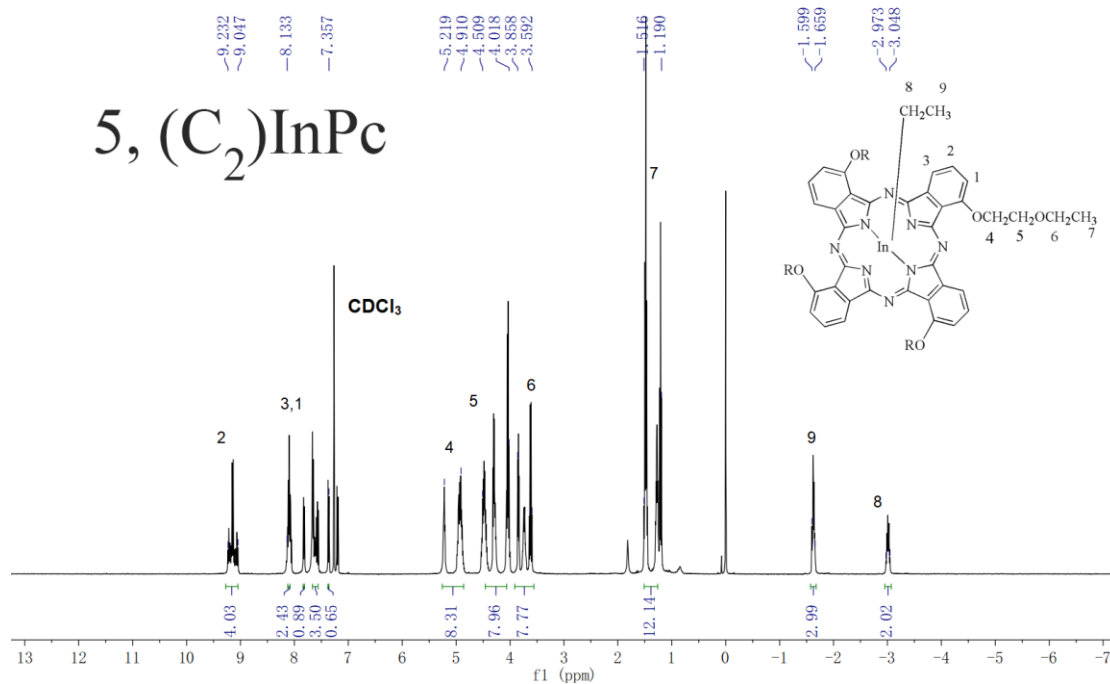

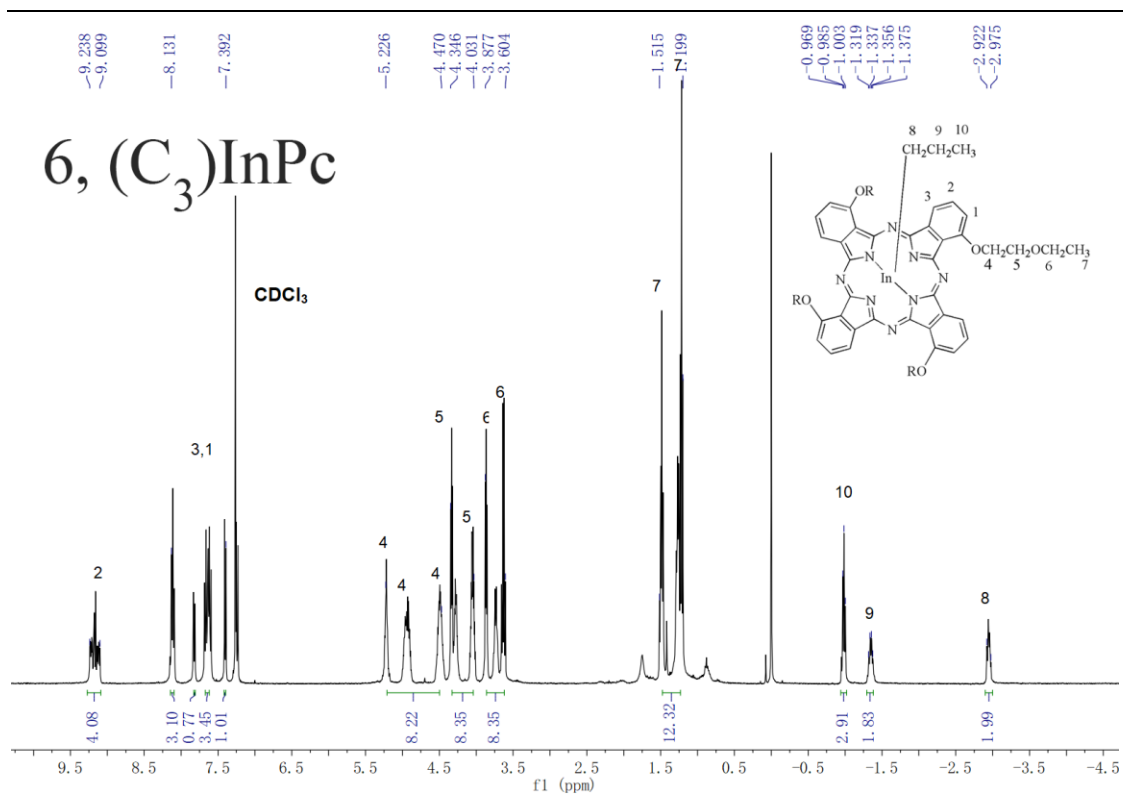

**Fig. S10** <sup>1</sup>H NMR spectrum of ((C<sub>3</sub>)InPc, **6**).

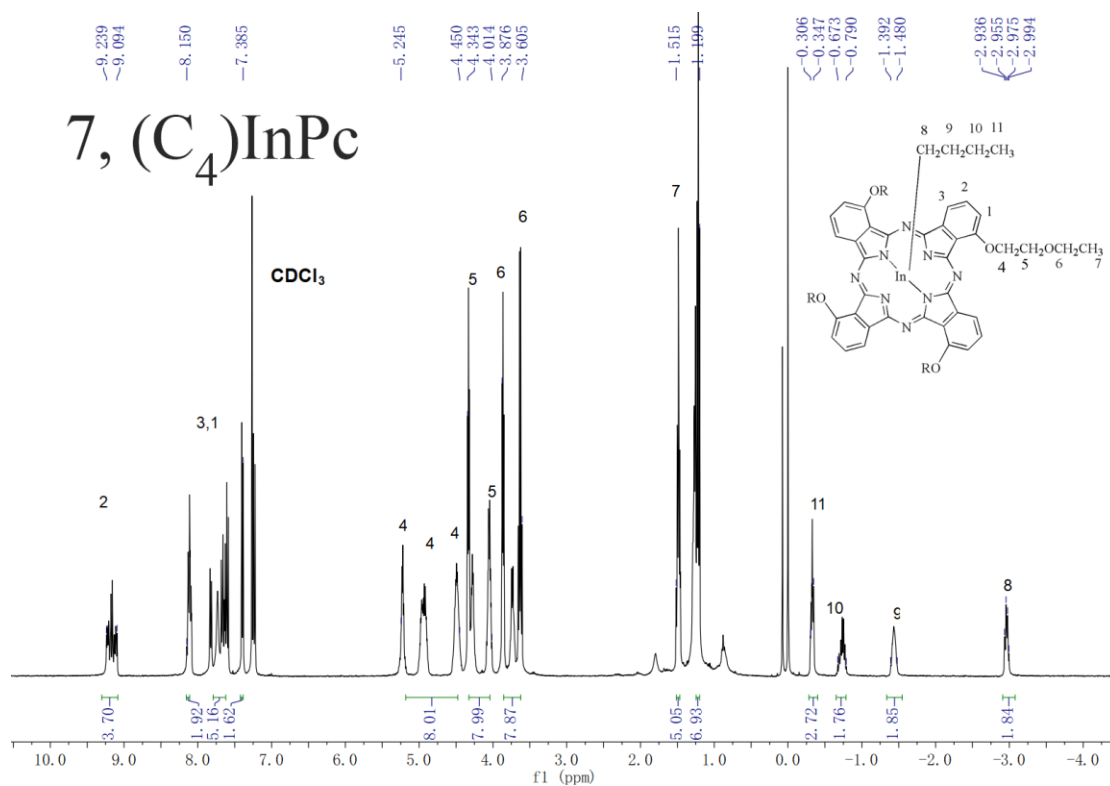

**Fig. S11** <sup>1</sup>H NMR spectrum of ((C<sub>4</sub>)InPc, **7**).

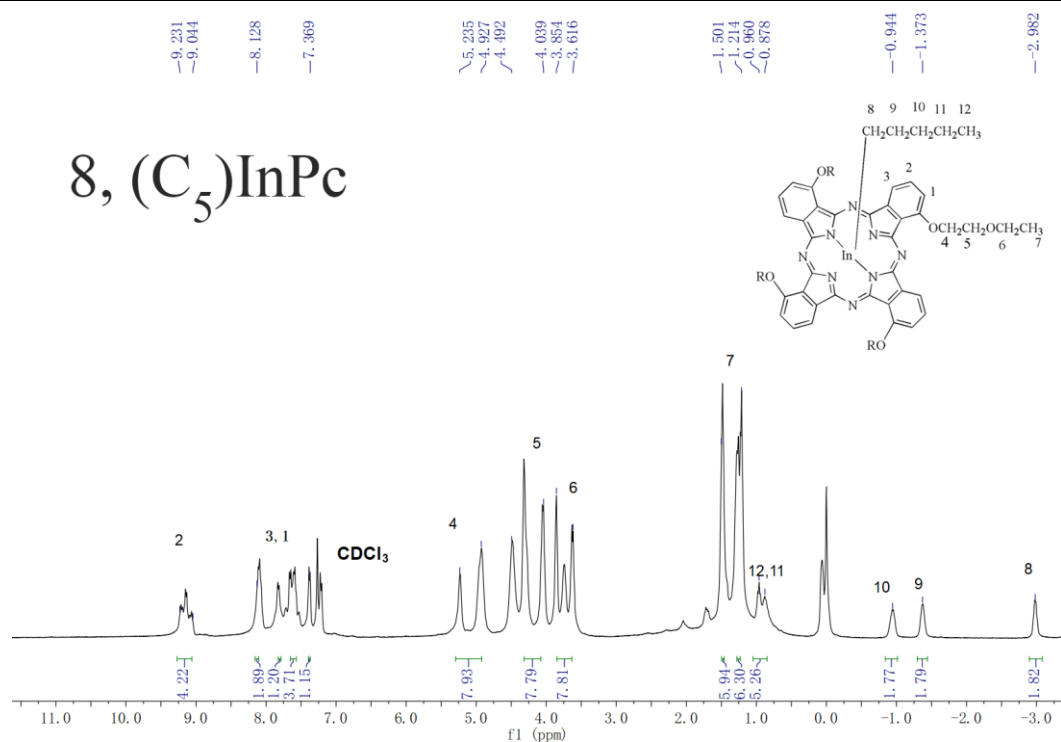

Fig. S12 <sup>1</sup>H NMR spectrum of ((C<sub>5</sub>)InPc, 8).

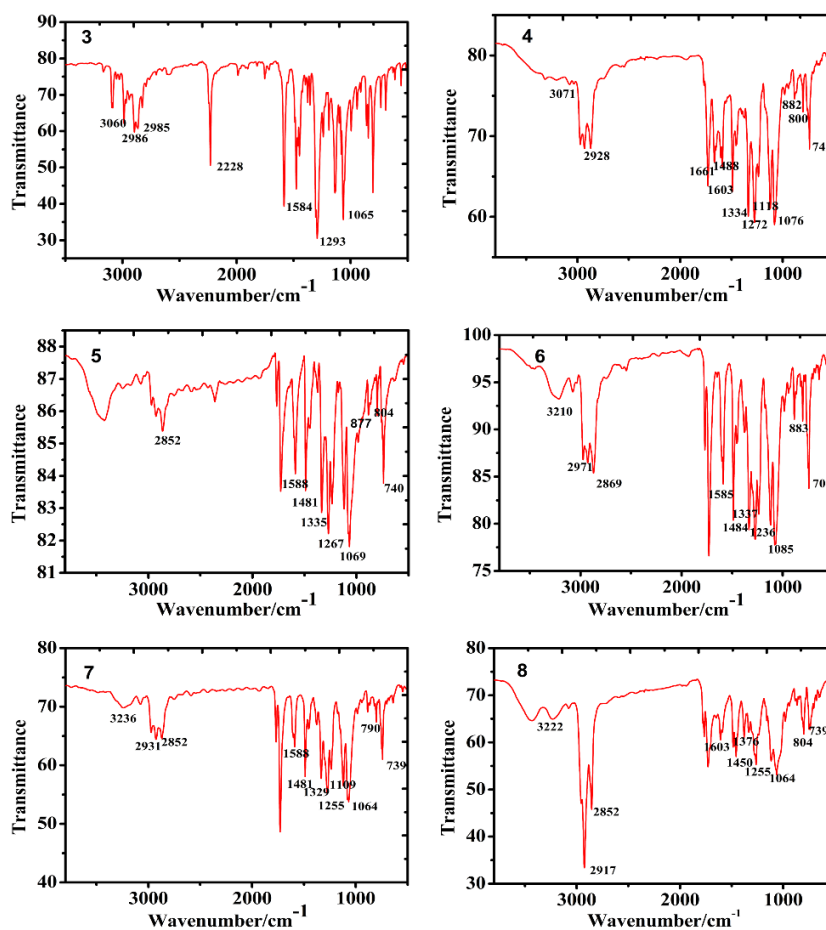

Fig. S13 FT-IR spectra of complexes phthalonitrile (3), (InClPc, 4), ((C<sub>2</sub>)InPc, 5), ((C<sub>3</sub>)InPc, 6) ((C<sub>4</sub>)InPc, 7) and ((C<sub>5</sub>)InPc, 8).

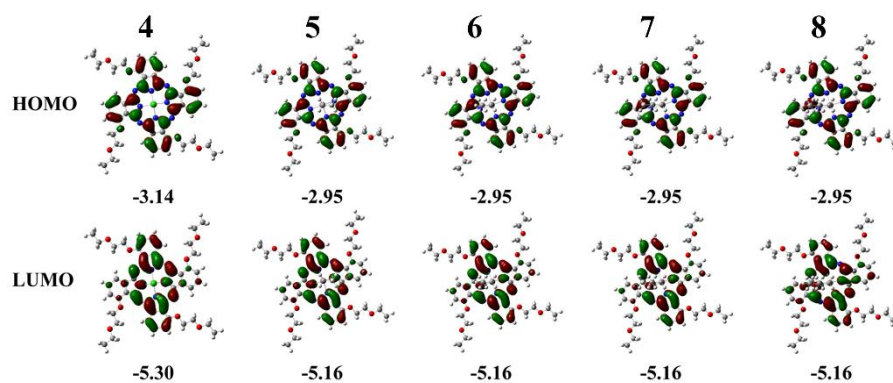

Fig. S14 Nodal patterns of the frontier  $\pi$ -MOs of 4, 5, 6, 7 and 8 in TD-DFT calculations.

Theoretical calculations were performed to study the HOMO/LUMO information of complexes 4-8 using the LANL2DZ with basis set of the 6-31G(d) level by the Gaussian 09 package. And PCM model with Dimethyl sulfoxide as the solvent were performed. Figure S14, shows the HOMO/LUMO gap energies of complexes 4-8.

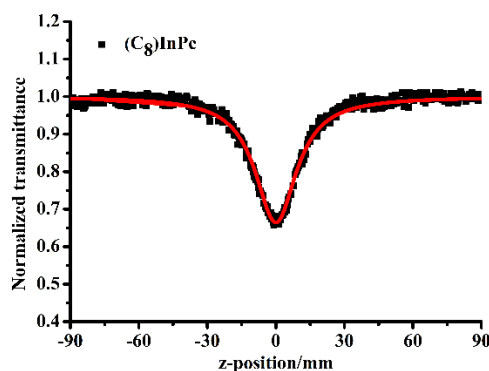

Fig. S15 Open-aperture Z-scan curve of the  $C_8$  excited under 4ns pulses at 532 nm.

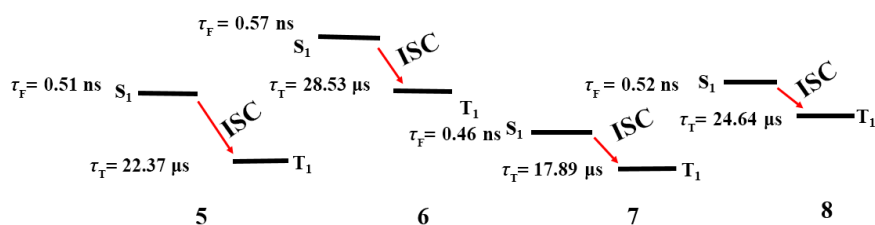

Fig. S16 Energy level diagrams to explain the dynamics of the transient state population of complexes 5-8.



**Table. S1** The values of the nonlinear absorption coefficients of phthalocyanine complexes studied at 532 nm using nanosecond pulses.

| Sample                    | Wavelength   | Concentration<br>(mol L <sup>-1</sup> ) | T (%) | Intensity<br>(W/cm <sup>2</sup> ) | $\beta/\alpha_2$<br>(cm/GW) | Reference    |
|---------------------------|--------------|-----------------------------------------|-------|-----------------------------------|-----------------------------|--------------|
| alkoxy<br>phthalocyanines | 532 nm, 6 ns | —                                       | 70    | $3.1 \times 10^6$                 | 1650 (Pc1)                  | 62           |
|                           |              |                                         |       |                                   | 1850 (Pc2)                  |              |
| alkyl<br>phthalocyanines  | 532 nm, 6 ns | $5 \times 10^{-4}$                      | ~75   | $6 \times 10^6$                   | 310 (Pc1)                   | 63           |
|                           |              |                                         |       |                                   | 420 (Pc2)                   |              |
| InClPc                    | 532 nm, 4 ns | $2 \times 10^{-4}$                      | 90    | $2.70 \times 10^8$                | 18.58                       | In this work |
| (C <sub>2</sub> )InPc     | 532 nm, 4 ns | $2 \times 10^{-4}$                      | 88    | $2.70 \times 10^8$                | 22.15                       | In this work |
| (C <sub>3</sub> )InPc     | 532 nm, 4 ns | $2 \times 10^{-4}$                      | 90    | $2.70 \times 10^8$                | 23.67                       | In this work |
| (C <sub>4</sub> )InPc     | 532 nm, 4 ns | $2 \times 10^{-4}$                      | 90    | $2.70 \times 10^8$                | 24.45                       | In this work |
| (C <sub>5</sub> )InPc     | 532 nm, 4 ns | $2 \times 10^{-4}$                      | 87    | $2.70 \times 10^8$                | 26.06                       | In this work |
